# Supplementary material for: A microwave spectroscopic and ab initio study of keto–enol tautomerism and isomerism in the cyclohexanone–water complex
Source: Royal Society of Chemistry journal article supplement (doi:10.1039/c9cp01999e), 2019-01-01
Supplement: c9cp01999e1.pdf [file c9cp01999e1.pdf]

**A Microwave Spectroscopic and *ab initio* Study of  
Keto-enol Tautomerism and Isomerism in the  
Cyclohexanone-Water Complex**  
**Electronic Supporting Information**

Jiao Gao, Nathan A. Seifert, and Wolfgang Jäger\*

Department of Chemistry, University of Alberta, Edmonton, AB T6G 2G2, Canada

\* Corresponding Author, e-mail: [wolfgang.jaeger@ualberta.ca](mailto:wolfgang.jaeger@ualberta.ca). Fax: 1-780-492-8231.

# Table of Contents

|                                                                                                                                                    |         |
|----------------------------------------------------------------------------------------------------------------------------------------------------|---------|
| 1. Table S1-S13 Cartesian coordinates for the predicted structures in Table 1.....                                                                 | S3-S15  |
| 2. Table S14 Measured and assigned transition frequencies (MHz) of the cyclohexanone-water complex and its $^{13}\text{C}$ isotopologues.....      | S16-S17 |
| 3. Table S15 Measured and assigned transition frequencies (MHz) of deuterium isotopologues of cyclohexanone-water .....                            | S18     |
| 4. Table S16 Spectroscopic parameters of $^{13}\text{C}$ and deuterium isotopologues of cyclohexanone-water .....                                  | S19     |
| 5. Table S17 Cartesian coordinates for the fitted $r_{m_{(1)}}$ geometry of the cyclohexanone-water complex.....                                   | S20     |
| 6. Table S18 BSSE corrected interaction energy analysis for a selection of ketone-water complexes at the MP2/6-311++g (2d, p) level of theory..... | S21     |

Table S1 Cartesian coordinates for the predicted structure of Keto chair in Table 1 at the B3LYP-D3/aVTZ level of theory.

| Atom | X      | Y      | Z      |
|------|--------|--------|--------|
| C1   | -1.080 | 0.000  | -0.095 |
| O2   | -2.215 | 0.000  | 0.326  |
| C3   | -0.315 | -1.279 | -0.372 |
| H4   | -0.192 | -1.358 | -1.457 |
| H5   | -0.915 | -2.124 | -0.040 |
| C6   | 1.075  | -1.260 | 0.287  |
| H7   | 1.627  | -2.155 | -0.001 |
| H8   | 0.954  | -1.301 | 1.373  |
| C9   | 1.855  | 0.000  | -0.086 |
| H10  | 2.054  | 0.000  | -1.162 |
| H11  | 2.826  | 0.000  | 0.412  |
| C12  | 1.075  | 1.260  | 0.287  |
| H13  | 1.627  | 2.155  | -0.001 |
| H14  | 0.954  | 1.301  | 1.373  |
| C15  | -0.315 | 1.279  | -0.372 |
| H16  | -0.915 | 2.124  | -0.040 |
| H17  | -0.192 | 1.358  | -1.457 |

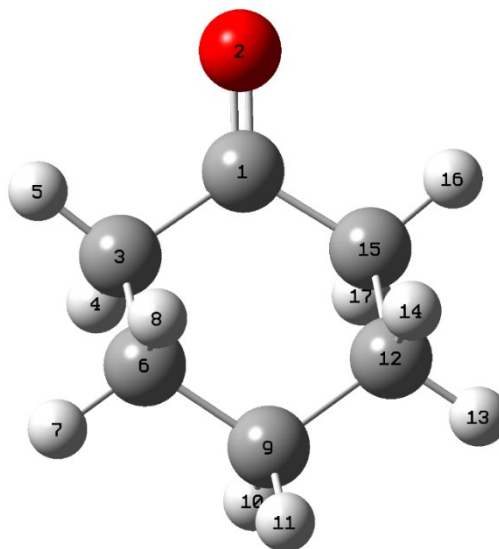

Table S2 Cartesian coordinates for the predicted structure of Keto boat in Table 1 at the B3LYP-D3/aVTZ level of theory.

| Atom | X      | Y      | Z      |
|------|--------|--------|--------|
| C1   | -1.068 | 1.230  | -0.364 |
| C2   | -1.923 | 0.000  | 0.000  |
| C3   | -1.068 | -1.230 | 0.364  |
| C4   | 0.282  | -1.229 | -0.355 |
| C5   | 1.099  | 0.000  | 0.000  |
| C6   | 0.282  | 1.229  | 0.355  |
| H7   | -2.577 | -0.239 | -0.839 |
| H8   | -2.577 | 0.239  | 0.839  |
| H9   | -0.883 | -0.243 | 1.440  |
| H10  | -1.611 | -2.147 | 0.140  |
| H11  | 0.877  | -2.114 | -0.134 |
| H12  | 0.131  | -1.212 | -1.440 |
| H13  | 0.131  | 1.212  | 1.440  |
| H14  | 0.877  | 2.114  | 0.134  |
| H15  | -0.883 | 1.243  | -1.440 |
| H16  | -1.611 | 2.147  | -0.140 |
| O17  | 2.309  | 0.000  | 0.000  |

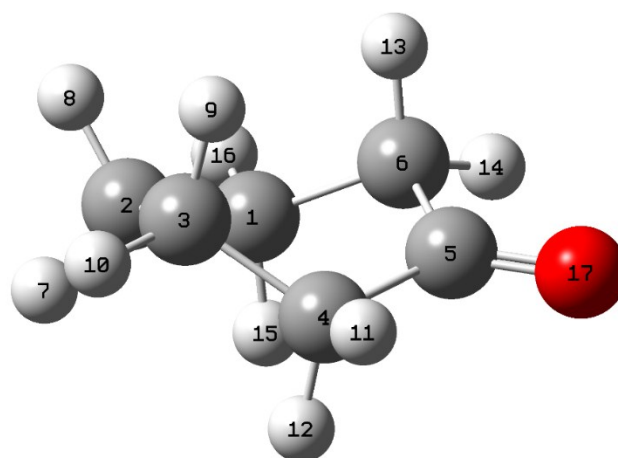

Table S3 Cartesian coordinates for the predicted structure of Keto skew in Table 1 at the B3LYP-D3/aVTZ level of theory.

| Atom | X      | Y      | Z      |
|------|--------|--------|--------|
| C1   | -1.711 | -0.017 | -0.524 |
| C2   | -1.077 | 1.330  | -0.120 |
| C3   | 1.070  | -0.023 | 0.047  |
| C4   | 0.315  | -1.344 | 0.091  |
| C5   | -1.187 | -1.168 | 0.335  |
| H6   | -0.967 | 1.961  | -1.001 |
| H7   | -1.739 | 1.864  | 0.563  |
| H8   | -1.380 | -0.962 | 1.391  |
| H9   | -1.472 | -0.236 | -1.568 |
| H10  | 0.783  | -1.960 | 0.864  |
| H11  | 0.501  | -1.850 | -0.858 |
| H12  | -1.712 | -2.095 | 0.102  |
| H13  | -2.798 | 0.050  | -0.464 |
| C14  | 0.301  | 1.170  | 0.564  |
| H15  | 0.148  | 0.994  | 1.634  |
| H16  | 0.912  | 2.064  | 0.463  |
| O17  | 2.205  | 0.050  | -0.367 |

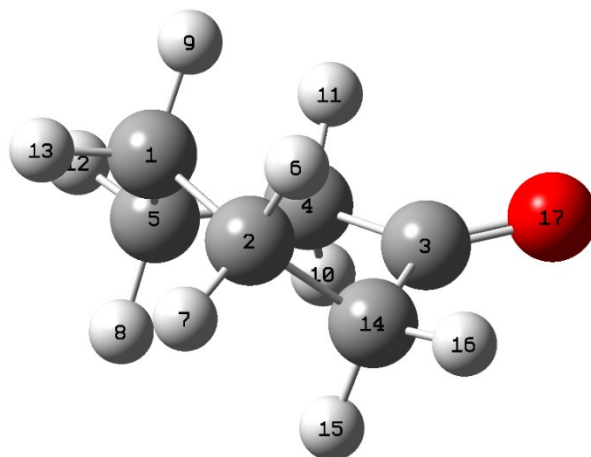

Table S4 Cartesian coordinates for the predicted structure of Enol 1(cis) in Table 1 at the B3LYP-D3/aVTZ level of theory.

| Atom | X      | Y      | Z      |
|------|--------|--------|--------|
| C1   | -0.965 | 0.075  | -0.006 |
| C2   | -0.325 | -1.275 | -0.077 |
| H3   | -0.447 | -1.668 | -1.092 |
| H4   | -0.875 | -1.955 | 0.576  |
| C5   | 1.154  | -1.224 | 0.305  |
| H6   | 1.642  | -2.157 | 0.024  |
| H7   | 1.241  | -1.134 | 1.392  |
| C8   | 1.844  | -0.030 | -0.351 |
| H9   | 1.748  | -0.116 | -1.437 |
| H10  | 2.912  | -0.032 | -0.124 |
| C11  | 1.211  | 1.284  | 0.108  |
| H12  | 1.551  | 2.102  | -0.531 |
| H13  | 1.565  | 1.530  | 1.116  |
| C14  | -0.291 | 1.220  | 0.092  |
| H15  | -0.838 | 2.155  | 0.165  |
| O16  | -2.335 | -0.012 | -0.056 |
| H17  | -2.712 | 0.874  | -0.053 |

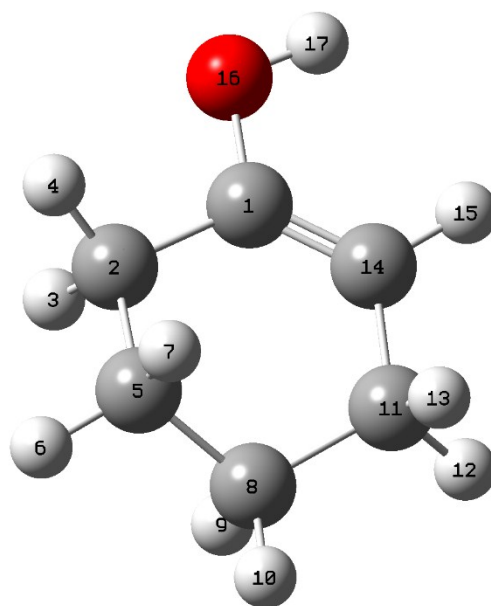

Table S5 Cartesian coordinates for the predicted structure of Enol 2(trans) in Table 1 at the B3LYP-D3/aVTZ level of theory.

| Atom | X      | Y      | Z      |
|------|--------|--------|--------|
| C1   | 0.966  | 0.077  | 0.001  |
| C2   | 0.323  | -1.275 | 0.073  |
| H3   | 0.447  | -1.677 | 1.085  |
| H4   | 0.855  | -1.960 | -0.596 |
| C5   | -1.159 | -1.226 | -0.303 |
| H6   | -1.645 | -2.160 | -0.018 |
| H7   | -1.249 | -1.138 | -1.388 |
| C8   | -1.844 | -0.031 | 0.355  |
| H9   | -1.743 | -0.116 | 1.441  |
| H10  | -2.912 | -0.034 | 0.133  |
| C11  | -1.210 | 1.280  | -0.108 |
| H12  | -1.547 | 2.100  | 0.531  |
| H13  | -1.569 | 1.526  | -1.115 |
| C14  | 0.291  | 1.219  | -0.099 |
| H15  | 0.849  | 2.144  | -0.168 |
| O16  | 2.342  | 0.100  | 0.064  |
| H17  | 2.678  | -0.799 | 0.038  |

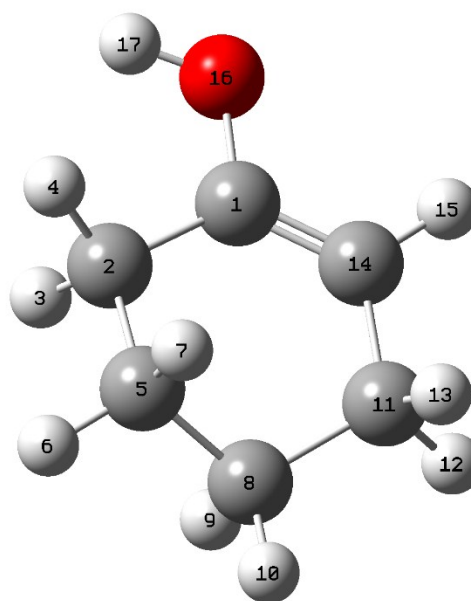

Table S6 Cartesian coordinates for the predicted structure of Keto chair-H<sub>2</sub>O in Table 1 at the B3LYP-D3/aVTZ level of theory.

| Atom | X      | Y      | Z      |
|------|--------|--------|--------|
| C1   | 0.258  | -0.649 | 0.240  |
| C2   | 0.216  | 0.811  | 0.625  |
| C3   | -0.877 | 1.559  | -0.158 |
| C4   | -2.232 | 0.862  | -0.043 |
| C5   | -2.145 | -0.591 | -0.508 |
| C6   | -1.070 | -1.369 | 0.270  |
| O7   | 1.284  | -1.215 | -0.089 |
| H8   | -1.376 | -1.446 | 1.318  |
| H9   | -0.933 | -2.377 | -0.116 |
| H10  | -3.107 | -1.092 | -0.395 |
| H11  | -1.901 | -0.617 | -1.573 |
| H12  | -2.570 | 0.892  | 0.997  |
| H13  | -2.979 | 1.398  | -0.631 |
| H14  | -0.938 | 2.586  | 0.203  |
| H15  | -0.584 | 1.614  | -1.209 |
| H16  | 1.197  | 1.256  | 0.481  |
| H17  | -0.022 | 0.855  | 1.694  |
| O18  | 3.487  | 0.555  | -0.234 |
| H19  | 4.314  | 0.155  | -0.512 |
| H20  | 2.835  | -0.169 | -0.213 |

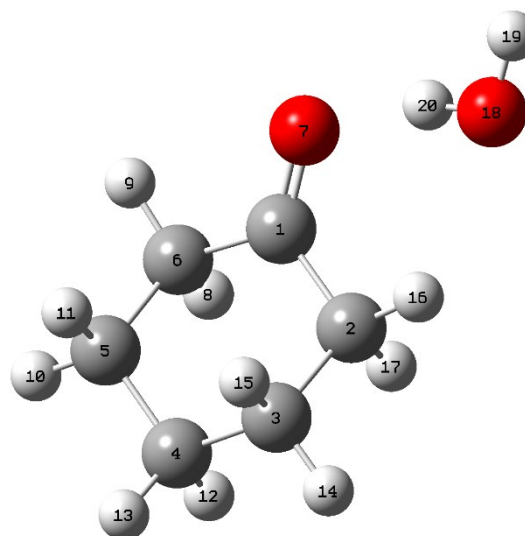



Table S7 Cartesian coordinates for the predicted structure of Keto boat-H<sub>2</sub>O in Table 1 at the B3LYP-D3/aVTZ level of theory.

| Atom | X      | Y      | Z      |
|------|--------|--------|--------|
| C1   | -1.052 | 1.470  | -0.433 |
| C2   | -2.348 | 0.803  | 0.068  |
| C3   | -2.134 | -0.665 | 0.486  |
| C4   | -1.000 | -1.329 | -0.298 |
| C5   | 0.311  | -0.609 | -0.079 |
| C6   | 0.200  | 0.870  | 0.209  |
| H7   | -3.103 | 0.859  | -0.715 |
| H8   | -2.746 | 1.359  | 0.918  |
| H9   | -1.890 | -0.714 | 1.549  |
| H10  | -3.056 | -1.232 | 0.361  |
| H11  | -0.868 | -2.379 | -0.043 |
| H12  | -1.211 | -1.287 | -1.373 |
| H13  | 0.153  | 0.974  | 1.299  |
| H14  | 1.116  | 1.366  | -0.106 |
| H15  | -0.972 | 1.352  | -1.516 |
| H16  | -1.083 | 2.544  | -0.249 |
| O17  | 1.377  | -1.192 | -0.129 |
| O18  | 3.541  | 0.601  | 0.157  |
| H19  | 4.400  | 0.229  | -0.062 |
| H20  | 2.905  | -0.129 | 0.059  |

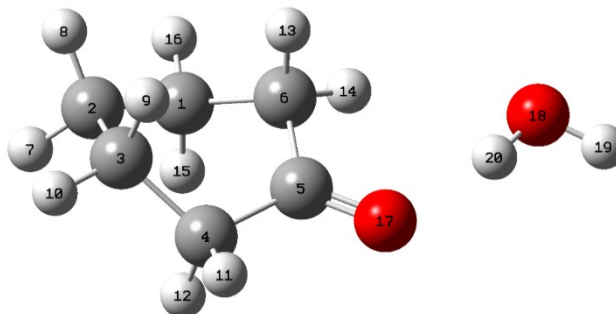

Table S8 Cartesian coordinates for the predicted structure of Keto skew-H<sub>2</sub>O I in Table 1 at the B3LYP-D3/aVTZ level of theory.

| Atom | X      | Y      | Z      |
|------|--------|--------|--------|
| C1   | -1.953 | -0.874 | -0.664 |
| C2   | -2.147 | 0.648  | -0.505 |
| C3   | 0.267  | 0.625  | 0.267  |
| C4   | 0.260  | -0.872 | 0.494  |
| C5   | -1.151 | -1.465 | 0.495  |
| H6   | -2.137 | 1.124  | -1.485 |
| H7   | -3.124 | 0.858  | -0.068 |
| H8   | -1.654 | -1.254 | 1.442  |
| H9   | -1.411 | -1.080 | -1.590 |
| H10  | 0.785  | -1.061 | 1.434  |
| H11  | 0.879  | -1.323 | -0.282 |
| H12  | -1.093 | -2.550 | 0.412  |
| H13  | -2.921 | -1.365 | -0.757 |
| C14  | -1.069 | 1.306  | 0.387  |
| H15  | -0.957 | 2.367  | 0.178  |
| H16  | -1.367 | 1.204  | 1.435  |
| O17  | 1.289  | 1.236  | 0.013  |
| O18  | 3.432  | -0.568 | -0.358 |
| H19  | 4.242  | -0.166 | -0.681 |
| H20  | 2.804  | 0.166  | -0.236 |

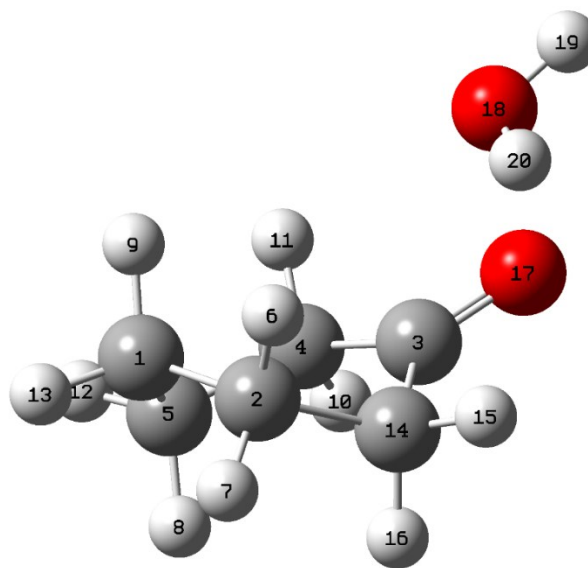

Table S9 Cartesian coordinates for the predicted structure of Keto skew-H<sub>2</sub>O II in Table 1 at the B3LYP-D3/aVTZ level of theory.

| Atom | X      | Y      | Z      |
|------|--------|--------|--------|
| C1   | -2.057 | 0.831  | -0.575 |
| C2   | -0.832 | 1.611  | -0.053 |
| C3   | 0.244  | -0.675 | 0.118  |
| C4   | -1.089 | -1.391 | 0.025  |
| C5   | -2.285 | -0.455 | 0.218  |
| H6   | -0.331 | 2.109  | -0.883 |
| H7   | -1.152 | 2.396  | 0.631  |
| H8   | -2.417 | -0.220 | 1.278  |
| H9   | -1.901 | 0.561  | -1.622 |
| H10  | -1.077 | -2.196 | 0.764  |
| H11  | -1.124 | -1.876 | -0.952 |
| H12  | -3.200 | -0.952 | -0.103 |
| H13  | -2.942 | 1.465  | -0.549 |
| C14  | 0.191  | 0.718  | 0.685  |
| H15  | 1.184  | 1.159  | 0.693  |
| H16  | -0.129 | 0.602  | 1.726  |
| O17  | 1.273  | -1.215 | -0.239 |
| O18  | 3.474  | 0.544  | -0.101 |
| H19  | 2.823  | -0.174 | -0.188 |
| H20  | 4.315  | 0.171  | -0.378 |

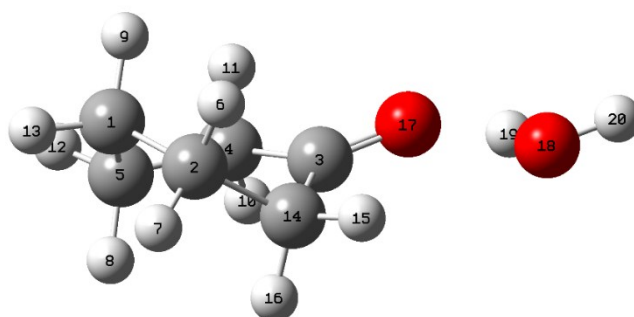

Table S10 Cartesian coordinates for the predicted structure of (cis)Enol I-H<sub>2</sub>O I in Table 1 at the B3LYP-D3/aVTZ level of theory.

| Atom | X      | Y      | Z      |
|------|--------|--------|--------|
| C1   | 0.223  | 0.563  | -0.314 |
| C2   | 0.124  | -0.918 | -0.487 |
| H3   | 0.686  | -1.404 | 0.315  |
| H4   | 0.626  | -1.195 | -1.417 |
| C5   | -1.332 | -1.385 | -0.495 |
| H6   | -1.372 | -2.469 | -0.378 |
| H7   | -1.780 | -1.153 | -1.465 |
| C8   | -2.134 | -0.692 | 0.604  |
| H9   | -1.681 | -0.919 | 1.573  |
| H10  | -3.155 | -1.073 | 0.632  |
| C11  | -2.145 | 0.823  | 0.396  |
| H12  | -2.518 | 1.319  | 1.296  |
| H13  | -2.852 | 1.083  | -0.399 |
| C14  | -0.777 | 1.353  | 0.060  |
| H15  | -0.614 | 2.423  | 0.137  |
| O16  | 1.497  | 1.026  | -0.591 |
| H17  | 1.539  | 1.974  | -0.419 |
| O18  | 3.537  | -0.550 | 0.741  |
| H19  | 4.185  | -0.858 | 0.102  |
| H20  | 2.913  | -0.009 | 0.233  |

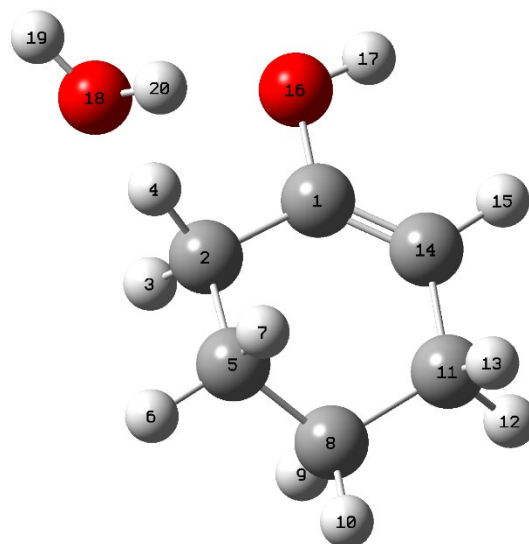

Table S11 Cartesian coordinates for the predicted structure of (cis)Enol I-H<sub>2</sub>O II in Table 1 at the B3LYP-D3/aVTZ level of theory.

| Atom | X      | Y      | Z      |
|------|--------|--------|--------|
| C1   | 0.237  | -0.463 | 0.004  |
| C2   | -0.936 | -1.392 | 0.083  |
| H3   | -0.998 | -1.793 | 1.100  |
| H4   | -0.742 | -2.248 | -0.565 |
| C5   | -2.244 | -0.699 | -0.300 |
| H6   | -3.093 | -1.324 | -0.017 |
| H7   | -2.284 | -0.583 | -1.387 |
| C8   | -2.340 | 0.677  | 0.351  |
| H9   | -2.288 | 0.561  | 1.438  |
| H10  | -3.301 | 1.143  | 0.126  |
| C11  | -1.194 | 1.577  | -0.114 |
| H12  | -1.141 | 2.465  | 0.521  |
| H13  | -1.410 | 1.950  | -1.123 |
| C14  | 0.130  | 0.862  | -0.099 |
| H15  | 1.031  | 1.460  | -0.176 |
| O16  | 1.423  | -1.142 | 0.051  |
| H17  | 2.168  | -0.518 | 0.031  |
| O18  | 3.765  | 0.498  | -0.002 |
| H19  | 4.274  | 0.434  | 0.811  |
| H20  | 4.366  | 0.238  | -0.707 |

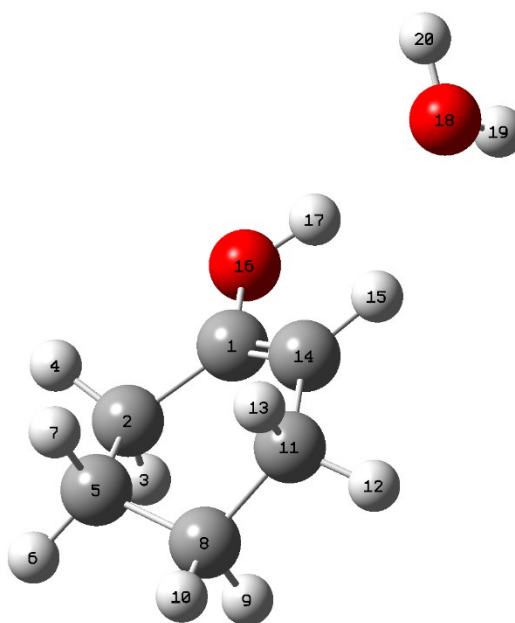

Table S12 Cartesian coordinates for the predicted structure of (trans)Enol II-H<sub>2</sub>O I in Table 1 at the B3LYP-D3/aVTZ level of theory.

| Atom | X      | Y      | Z      |
|------|--------|--------|--------|
| C1   | -0.237 | -0.459 | -0.044 |
| C2   | 0.939  | -1.386 | -0.051 |
| H3   | 1.051  | -1.819 | -1.051 |
| H4   | 0.744  | -2.223 | 0.627  |
| C5   | 2.226  | -0.668 | 0.365  |
| H6   | 3.090  | -1.290 | 0.127  |
| H7   | 2.222  | -0.528 | 1.449  |
| C8   | 2.331  | 0.693  | -0.316 |
| H9   | 2.328  | 0.552  | -1.401 |
| H10  | 3.275  | 1.175  | -0.061 |
| C11  | 1.156  | 1.591  | 0.076  |
| H12  | 1.115  | 2.460  | -0.584 |
| H13  | 1.320  | 1.995  | 1.082  |
| C14  | -0.157 | 0.863  | 0.028  |
| H15  | -1.072 | 1.442  | 0.040  |
| O16  | -1.481 | -1.065 | -0.133 |
| H17  | -1.382 | -2.020 | -0.143 |
| O18  | -3.890 | 0.553  | -0.025 |
| H19  | -3.121 | -0.033 | -0.062 |
| H20  | -4.151 | 0.567  | 0.899  |

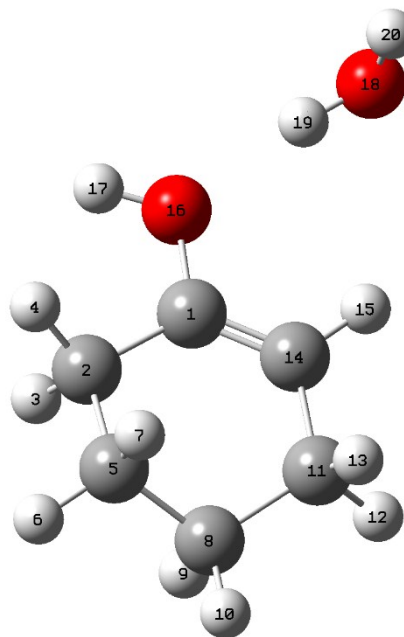

Table S13 Cartesian coordinates for the predicted structure of (cis)Enol II-H<sub>2</sub>O II in Table 1 at the B3LYP-D3/aVTZ level of theory.

| Atom | X      | Y      | Z      |
|------|--------|--------|--------|
| C1   | -0.179 | -0.605 | 0.003  |
| C2   | -0.165 | 0.896  | 0.065  |
| H3   | -0.446 | 1.212  | 1.076  |
| H4   | -0.940 | 1.290  | -0.597 |
| C5   | 1.199  | 1.475  | -0.312 |
| H6   | 1.244  | 2.530  | -0.035 |
| H7   | 1.321  | 1.425  | -1.397 |
| C8   | 2.326  | 0.688  | 0.353  |
| H9   | 2.196  | 0.728  | 1.438  |
| H10  | 3.293  | 1.142  | 0.130  |
| C11  | 2.307  | -0.771 | -0.103 |
| H12  | 2.961  | -1.366 | 0.538  |
| H13  | 2.737  | -0.844 | -1.110 |
| C14  | 0.920  | -1.350 | -0.089 |
| H15  | 0.808  | -2.426 | -0.149 |
| O16  | -1.410 | -1.202 | 0.067  |
| H17  | -2.116 | -0.538 | 0.044  |
| O18  | -3.715 | 0.486  | -0.014 |
| H19  | -4.200 | 0.446  | 0.815  |
| H20  | -4.309 | 0.125  | -0.680 |

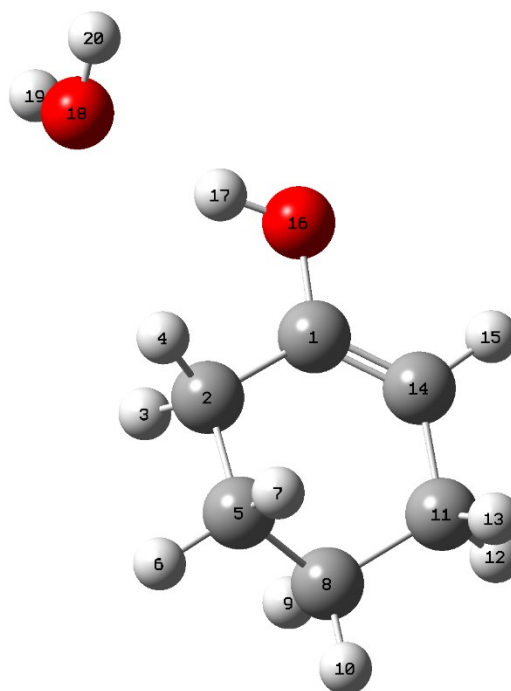

Table S14 Measured and assigned transition frequencies (MHz) of cyclohexanone-water complex and its <sup>13</sup>C isotopologues.

| J' | Ka' | Kc' | J'' | Ka'' | Kc'' | Parent species | o-c <sup>a</sup> | <sup>13</sup> C1 | o-c     | <sup>13</sup> C2 | o-c     | <sup>13</sup> C3 | o-c     |
|----|-----|-----|-----|------|------|----------------|------------------|------------------|---------|------------------|---------|------------------|---------|
| 4  | 1   | 4   | 3   | 1    | 3    | 7653.4669      | -0.0014          | 7648.4162        | 0.0004  | 7616.9535        | -0.0023 | 7582.5818        | -0.0002 |
| 4  | 0   | 4   | 3   | 0    | 3    | 7966.8746      | -0.0001          | 7961.7640        | -0.0004 | 7930.1009        | -0.0026 | 7892.0374        | -0.0004 |
| 4  | 2   | 3   | 3   | 2    | 2    | 8105.8421      | 0.0015           | 8101.9076        | 0.0004  |                  |         | 8026.0685        | -0.0004 |
| 4  | 3   | 1   | 3   | 3    | 0    | 8151.5101      | 0.0059           |                  |         |                  |         |                  |         |
| 4  | 3   | 2   | 3   | 3    | 1    | 8147.3348      | -0.0092          |                  |         |                  |         |                  |         |
| 4  | 2   | 2   | 3   | 2    | 1    | 8256.6417      | 0.0012           | 8253.9858        | -0.0011 | 8229.0496        | 0.0035  | 8171.4966        | 0.0006  |
| 4  | 1   | 3   | 3   | 1    | 2    | 8519.7005      | 0.0002           | 8516.5409        | 0.0004  | 8490.1650        | -0.0043 | 8432.4521        | 0.0001  |
| 5  | 1   | 5   | 4   | 1    | 4    | 9541.9745      | -0.0001          | 9535.4694        | 0.0008  | 9495.6188        | -0.0002 | 9454.2051        | 0.0011  |
| 5  | 0   | 5   | 4   | 0    | 4    | 9857.5866      | 0.0002           | 9850.4869        | -0.0006 | 9808.9700        | -0.0023 | 9767.2686        | -0.0009 |
| 5  | 2   | 4   | 4   | 2    | 3    | 10112.7261     | 0.0023           | 10107.6361       | -0.0012 | 10071.5926       | -0.0098 | 10013.7249       | 0.0011  |
| 5  | 3   | 3   | 4   | 3    | 2    | 10194.0923     | 0.0030           |                  |         |                  |         |                  |         |
| 5  | 3   | 2   | 4   | 3    | 1    | 10208.5433     | -0.0015          |                  |         |                  |         |                  |         |
| 5  | 2   | 3   | 4   | 2    | 2    | 10401.8661     | -0.0011          | 10399.0891       | 0.0004  | 10369.3599       | -0.0066 | 10292.9389       | -0.0017 |
| 5  | 1   | 4   | 4   | 1    | 3    | 10615.4494     | 0.0020           | 10611.1653       | 0.0003  | 10577.2781       | -0.0002 | 10507.7230       | 0.0009  |
| 6  | 1   | 6   | 5   | 1    | 5    | 11417.2271     | -0.0025          | 11409.1916       | 0.0006  | 11360.7386       | 0.0046  | 11312.9647       | 0.0003  |
| 6  | 0   | 6   | 5   | 0    | 5    | 11702.4169     | -0.0011          | 11693.2252       | -0.0004 | 11641.5896       | -0.0003 | 11597.5194       | -0.0005 |
| 6  | 2   | 5   | 5   | 2    | 4    | 12106.7479     | 0.0024           | 12100.3976       | 0.0009  | 12056.4676       | -0.0048 | 11988.9800       | -0.0002 |
| 3  | 1   | 2   | 2   | 0    | 2    | 9028.3536      | 0.0007           | 9017.0353        | 0.0001  |                  |         |                  |         |
| 2  | 2   | 0   | 1   | 1    | 0    | 10810.3779     | -0.0006          |                  |         |                  |         |                  |         |
| 2  | 2   | 1   | 1   | 1    | 1    | 11012.4566     | 0.0003           |                  |         |                  |         |                  |         |
| 4  | 1   | 3   | 3   | 0    | 3    | 11521.3266     | -0.0007          |                  |         |                  |         |                  |         |
| 6  | 2   | 4   | 5   | 2    | 3    | 12579.4457     | -0.0035          | 12576.5300       | -0.0000 | 12541.9568       | 0.0020  | 12446.3464       | 0.0001  |
| 6  | 1   | 5   | 5   | 1    | 4    | 12684.6070     | 0.0008           | 12678.9231       | -0.0003 | 12636.7553       | 0.0056  | 12557.4922       | 0.0002  |
| 7  | 1   | 7   | 6   | 1    | 6    | 13279.3988     | 0.0001           | 13269.7679       | -0.0002 |                  |         |                  |         |
| 7  | 0   | 7   | 6   | 0    | 6    | 13513.9845     | 0.0011           | 13502.8208       | -0.0001 |                  |         |                  |         |

<sup>a</sup> observed - calculated



Table S14 (continued)

| J' | Ka' | Kc' | J'' | Ka'' | Kc'' | <sup>13</sup> C4 | o-c <sup>a</sup> | <sup>13</sup> C5 | o-c     | <sup>13</sup> C6 | o-c     |
|----|-----|-----|-----|------|------|------------------|------------------|------------------|---------|------------------|---------|
| 4  | 1   | 4   | 3   | 1    | 3    | 7574.5005        | -0.0001          | 7617.1697        | -0.0011 | 7644.9030        | 0.0014  |
| 4  | 0   | 4   | 3   | 0    | 3    | 7884.8118        | 0.0019           | 7930.9659        | -0.0003 | 7957.1899        | 0.0000  |
| 4  | 2   | 3   | 3   | 2    | 2    | 8020.2680        | -0.0022          | 8076.7644        | 0.0003  | 8097.3671        | -0.0026 |
| 4  | 3   | 1   | 3   | 3    | 0    |                  |                  |                  |         |                  |         |
| 4  | 3   | 2   | 3   | 3    | 1    |                  |                  |                  |         |                  |         |
| 4  | 2   | 2   | 3   | 2    | 1    | 8167.2506        | 0.0016           | 8235.0237        | -0.0001 | 8249.4938        | -0.0015 |
| 4  | 1   | 3   | 3   | 1    | 2    | 8428.5224        | 0.0003           | 8495.8662        | 0.0005  | 8510.9652        | -0.0004 |
| 5  | 1   | 5   | 4   | 1    | 4    | 9443.8626        | -0.0009          | 9495.4873        | 0.0032  | 9531.0759        | 0.0015  |
| 5  | 0   | 5   | 4   | 0    | 4    | 9757.3152        | -0.0003          | 9808.5389        | -0.0021 | 9844.8003        | 0.0010  |
| 5  | 2   | 4   | 4   | 2    | 3    | 10006.2699       | 0.0008           | 10075.3792       | 0.0006  | 10101.9580       | 0.0010  |
| 5  | 3   | 3   | 4   | 3    | 2    |                  |                  |                  |         |                  |         |
| 5  | 3   | 2   | 4   | 3    | 1    |                  |                  |                  |         |                  |         |
| 5  | 2   | 3   | 4   | 2    | 2    | 10288.3390       | 0.0000           | 10377.9834       | -0.0015 | 10393.4354       | -0.0002 |
| 5  | 1   | 4   | 4   | 1    | 3    | 10502.4178       | -0.0018          | 10583.7110       | 0.0009  | 10604.1693       | 0.0005  |
| 6  | 1   | 6   | 5   | 1    | 5    | 11300.2564       | 0.0002           | 11360.0767       | 0.0013  | 11403.9288       | 0.0042  |
| 6  | 0   | 6   | 5   | 0    | 5    | 11584.6077       | -0.0001          | 11639.5866       | -0.0027 | 11686.5223       | -0.0071 |
| 6  | 2   | 5   | 5   | 2    | 4    | 11979.7365       | 0.0003           | 12060.4897       | 0.0007  | 12093.5701       | 0.0012  |
| 3  | 1   | 2   | 2   | 0    | 2    |                  |                  |                  |         |                  |         |
| 2  | 2   | 0   | 1   | 1    | 0    |                  |                  |                  |         |                  |         |
| 2  | 2   | 1   | 1   | 1    | 1    |                  |                  |                  |         |                  |         |
| 4  | 1   | 3   | 3   | 0    | 3    |                  |                  |                  |         |                  |         |
| 6  | 2   | 4   | 5   | 2    | 3    | 12441.4757       | -0.0003          | 12553.2338       | -0.0016 | 12569.6020       | -0.0001 |
| 6  | 1   | 5   | 5   | 1    | 4    | 12550.4986       | 0.0007           | 12643.3443       | 0.0019  | 12670.4755       | 0.0004  |
| 7  | 1   | 7   | 6   | 1    | 6    |                  |                  |                  |         |                  |         |
| 7  | 0   | 7   | 6   | 0    | 6    |                  |                  |                  |         |                  |         |

<sup>a</sup> observed – calculated

Table S15 Measured and assigned transition frequencies (MHz) of cyclohexanone-water complex and its deuterium isotopologues.

| J' | Ka' | Kc' | J'' | Ka'' | Kc'' | D <sub>2</sub> O | o-c <sup>a</sup> | DOH(D1)    | o-c     | HOD(D2)    | o-c     |
|----|-----|-----|-----|------|------|------------------|------------------|------------|---------|------------|---------|
| 4  | 1   | 4   | 3   | 1    | 3    | 7296.6310        | -0.0002          | 7402.5886  | -0.0012 | 7538.3193  | 0.0013  |
| 4  | 0   | 4   | 3   | 0    | 3    | 7591.5310        | -0.0004          | 7702.8872  | -0.0005 | 7846.2262  | 0.0002  |
| 4  | 2   | 3   | 3   | 2    | 2    | 7703.4802        | -0.0069          | 7822.5315  | 0.0014  | 7975.8315  | -0.0025 |
| 4  | 2   | 2   | 3   | 2    | 1    |                  |                  | 7952.2881  | 0.0019  | 8116.4520  | -0.0005 |
| 4  | 1   | 3   | 3   | 1    | 2    | 8079.5313        | 0.0020           | 8209.4646  | 0.0012  | 8377.5305  | 0.0016  |
| 5  | 1   | 5   | 4   | 1    | 4    | 9100.5082        | 0.0015           | 9231.6430  | 0.0005  | 9399.6161  | 0.0004  |
| 5  | 0   | 5   | 4   | 0    | 4    | 9406.1798        | 0.0008           | 9540.2448  | -0.0005 | 9712.8163  | -0.0020 |
| 5  | 2   | 4   | 4   | 2    | 3    | 9613.6802        | 0.0019           | 9761.3717  | -0.0015 | 9951.5784  | 0.0018  |
| 5  | 2   | 3   | 4   | 2    | 2    | 9848.3957        | -0.0007          | 10011.6262 | -0.0039 | 10221.9882 | -0.0016 |
| 5  | 1   | 4   | 4   | 1    | 3    | 10072.5027       | 0.0020           | 10232.8715 | 0.0014  | 10440.2929 | 0.0010  |
| 6  | 1   | 6   | 5   | 1    | 5    | 10893.2658       | 0.0009           | 11048.9561 | -0.0002 | 11248.3846 | 0.0012  |
| 6  | 0   | 6   | 5   | 0    | 5    | 11179.9637       | -0.0017          | 11335.1898 | -0.0008 | 11535.0647 | -0.0027 |
| 6  | 2   | 5   | 5   | 2    | 4    | 11513.5416       | 0.0057           | 11689.1650 | 0.0031  | 11915.3410 | 0.0027  |
| 3  | 1   | 2   | 2   | 0    | 2    | 8704.2522        | 0.0001           | 8795.1668  | -0.0000 | 8927.9227  | 0.0003  |
| 2  | 2   | 0   | 1   | 1    | 0    | 10747.3514       | -0.0030          | 10752.7578 | -0.0001 | 10803.2995 | -0.0001 |
| 2  | 2   | 1   | 1   | 1    | 1    | 10931.4029       | 0.0028           |            |         |            |         |
| 6  | 2   | 4   | 5   | 2    | 3    | 11901.9789       | -0.0029          | 12101.8222 | -0.0019 | 12359.3091 | -0.0023 |
| 6  | 1   | 5   | 5   | 1    | 4    | 12044.8057       | -0.0010          | 12233.9507 | 0.0012  | 12478.5632 | 0.0013  |
| 7  | 1   | 7   | 6   | 1    | 6    | 12764.7708       | -0.0016          |            |         |            |         |

<sup>a</sup> observed – calculated

Table S16 Spectroscopic parameters of  $^{13}\text{C}$  and deuterium isotopologues of cyclohexanone-water.

| Rotational constant      | $^{13}\text{C-C1}$ | $^{13}\text{C-C2}$ | $^{13}\text{C-C3}$ | $^{13}\text{C-C4}$ | $^{13}\text{C-C5}$ | $^{13}\text{C-C6}$ |
|--------------------------|--------------------|--------------------|--------------------|--------------------|--------------------|--------------------|
| A/MHz                    | 3285.9316(25)      | 3255.551(71)       | 3283.8142(59)      | 3280.540(25)       | 3244.814(11)       | 3273.634(11)       |
| B/MHz                    | 1123.32189(21)     | 1120.4620(13)      | 1111.45482(28)     | 1111.27360(47)     | 1121.60512(58)     | 1122.4991(10)      |
| C/MHz                    | 905.21272(13)      | 901.0346(11)       | 897.98257(25)      | 896.74560(38)      | 900.77576(32)      | 904.90316(78)      |
| $\Delta_K/\text{kHz}$    | 17.23(17)          | 21(18)             | 24.87234771        | 18.0(67)           | 24.87234771        | 17.4(73)           |
| $\Delta_{JK}/\text{kHz}$ | -7.7041(16)        | -7.63(13)          | -7.474(23)         | -7.62(4)           | -7.467(49)         | -7.601(69)         |
| $\Delta_J/\text{kHz}$    | 1.0469(16)         | 1.038(12)          | 1.0182(15)         | 1.0294(42)         | 1.0483(33)         | 1.042(7)           |
| $\delta_J/\text{kHz}$    | 0.1704(13)         | 0.17(1)            | 0.161(2)           | 0.1700(35)         | 0.1715(42)         | 0.1583(73)         |
| N                        | 18                 | 14                 | 15                 | 15                 | 15                 | 15                 |
| $\sigma/\text{kHz}$      | 0.57               | 3.0                | 0.72               | 1.0                | 1.5                | 2.5                |

| Rotational constant      | $^a\text{DOH(D1)}$ | $^b\text{HOD(D2)}$ | $\text{D}_2\text{O}$ |
|--------------------------|--------------------|--------------------|----------------------|
| A/MHz                    | 3287.2880(41)      | 3298.6954(42)      | 3289.7280(63)        |
| B/MHz                    | 1080.39298(61)     | 1103.76562(61)     | 1062.38808(90)       |
| C/MHz                    | 877.82359(50)      | 893.01318(50)      | 865.90822(54)        |
| $\Delta_K/\text{kHz}$    | 25.5(9)            | 25.61(91)          | 19.3(13)             |
| $\Delta_{JK}/\text{kHz}$ | -7.290(45)         | -7.089(46)         | -6.706(71)           |
| $\Delta_J/\text{kHz}$    | 0.9803(35)         | 0.970(35)          | 0.9099(58)           |
| $\delta_J/\text{kHz}$    | 0.1500(45)         | 0.01564(45)        | 0.1402(52)           |
| N                        | 17                 | 17                 | 18                   |
| $\sigma/\text{kHz}$      | 1.6                | 1.6                | 2.7                  |

<sup>a</sup> D1 is the free proton of water.

<sup>b</sup> D2 is the proton of water hydrogen bonded to the carbonyl oxygen of cyclohexanone.

Table S17 Cartesian coordinates for the fitted  $r_m^{(1)}$  geometry of the cyclohexanone-water complex.

| Atom | X      | Y      | Z      |
|------|--------|--------|--------|
| C1   | 0.202  | 0.648  | -0.263 |
| C2   | 0.170  | -0.792 | -0.667 |
| C3   | -0.912 | -1.561 | 0.162  |
| C4   | -2.259 | -0.860 | 0.044  |
| C5   | -2.174 | 0.574  | 0.551  |
| C6   | -1.105 | 1.372  | -0.267 |
| O7   | 1.341  | 1.237  | 0.084  |
| H8   | -0.952 | 2.379  | 0.120  |
| H9   | -1.440 | 1.450  | -1.309 |
| H10  | 1.167  | -1.214 | -0.540 |
| H11  | -0.093 | -0.843 | -1.731 |
| H12  | -1.920 | 0.565  | 1.617  |
| H13  | -3.140 | 1.074  | 0.459  |
| H14  | -0.628 | -1.621 | 1.219  |
| H15  | -0.979 | -2.590 | -0.197 |
| H16  | -3.000 | -1.419 | 0.621  |
| H17  | -2.601 | -0.858 | -0.998 |
| H18  | 2.889  | 0.070  | 0.298  |
| O19  | 3.615  | -0.577 | 0.242  |
| H20  | 4.409  | -0.102 | 0.502  |

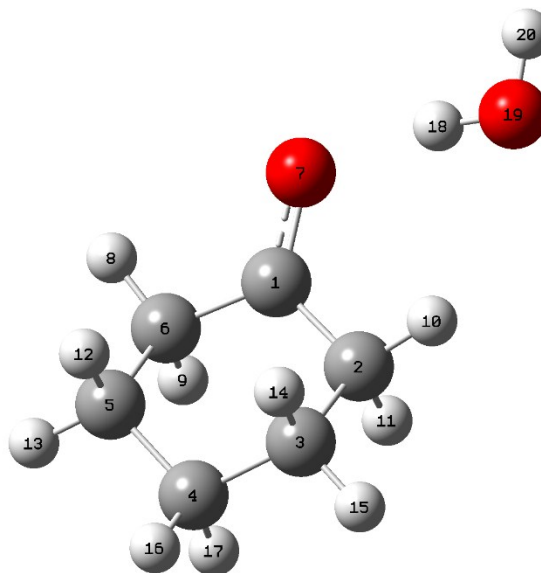

Table S18 BSSE corrected interaction energy analysis for a selection of ketone-water complexes at the MP2/6-311++g(2d,p) level of theory.

| Species                                           | Cyclohexanone | Cyclopentanone | Cyclobutanone | Acetone | Formaldehyde |
|---------------------------------------------------|---------------|----------------|---------------|---------|--------------|
| $\Delta E_{\text{binding}}(\text{kcal mol}^{-1})$ | -5.60         | -5.35          | -4.52         | -5.43   | -3.75        |
